# Supplementary material
Source: MDPI journal article supplement (https://www.mdpi.com/2076-3417/10/11/3939)
Supplement: s1 [file s1]

## **Supplementary Information**

### **A fast self-learning subspace reconstruction method for non-uniformly sampled nuclear magnetic resonance spectroscopy**

Zhangren Tu <sup>1</sup>, Huiting Liu <sup>2</sup>, Jiaying Zhan <sup>1</sup> and Di Guo <sup>1,\*</sup>

<sup>1</sup> School of Computer and Information Engineering, Xiamen University of  
Technology, Xiamen 361024, China

<sup>2</sup> Department of Electronic Science, Xiamen University, Xiamen 361005, China

\* Correspondence: [guodi@xmut.edu.cn](mailto:guodi@xmut.edu.cn)

## Appendix

We list three typical reconstruction results as shown in Figures S1-S3 which correspond to LRHM and LRHMF reconstruction in low, moderate and high fidelity, respectively. Tables S1-S3 show the correlation of the corresponding peaks in Figures S1-S3.

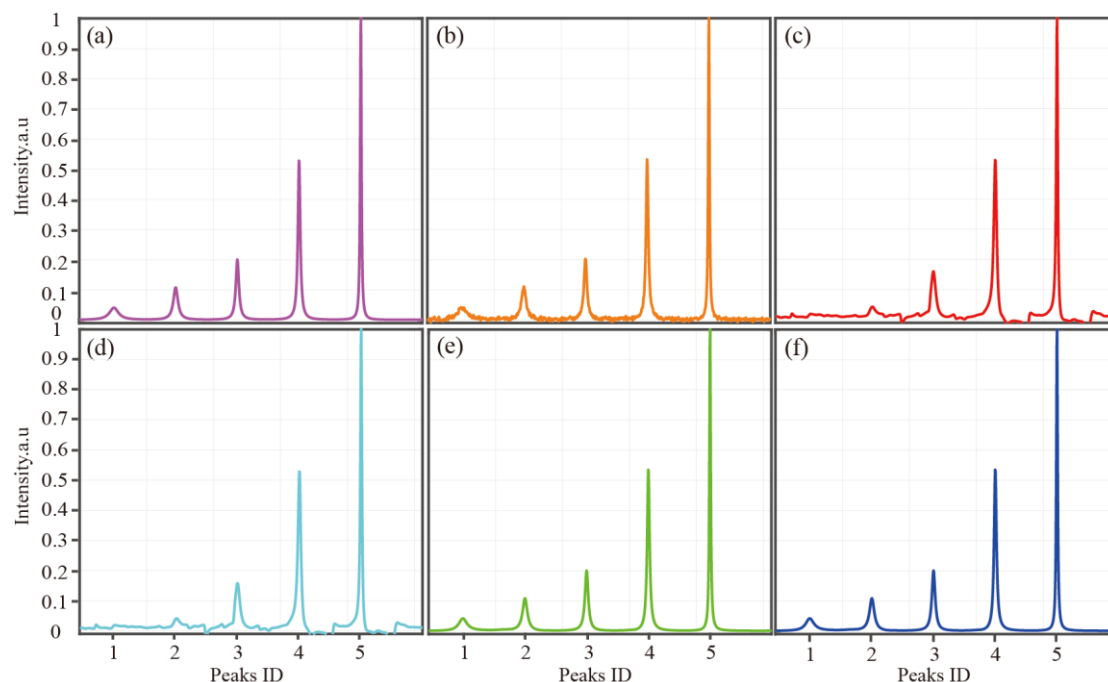

Figure S1. Low-fidelity reconstruction results for traditional methods. (a) The fully sampled spectrum; (b) is the noisy fully sampled spectrum; (c), (d), (e) and (f) are reconstructed spectra using the LRHM, LRHMF, SLS and SLSMF, respectively. Note: Reconstruction is performed on the synthetic 1D spectra with five peaks from 6% acquired data.

Table S1. Statistic of peaks correlations in Figure S1

| Peak ID<br>Method | 1     | 2     | 3     | 4     | 5     |
|-------------------|-------|-------|-------|-------|-------|
| LRHM              | 0.306 | 0.920 | 0.979 | 0.986 | 0.994 |
| LRHMF             | 0.281 | 0.905 | 0.977 | 0.986 | 0.994 |
| SLS               | 0.997 | 0.999 | 0.999 | 0.999 | 0.999 |
| SLSMF             | 0.997 | 0.999 | 0.999 | 0.999 | 0.999 |

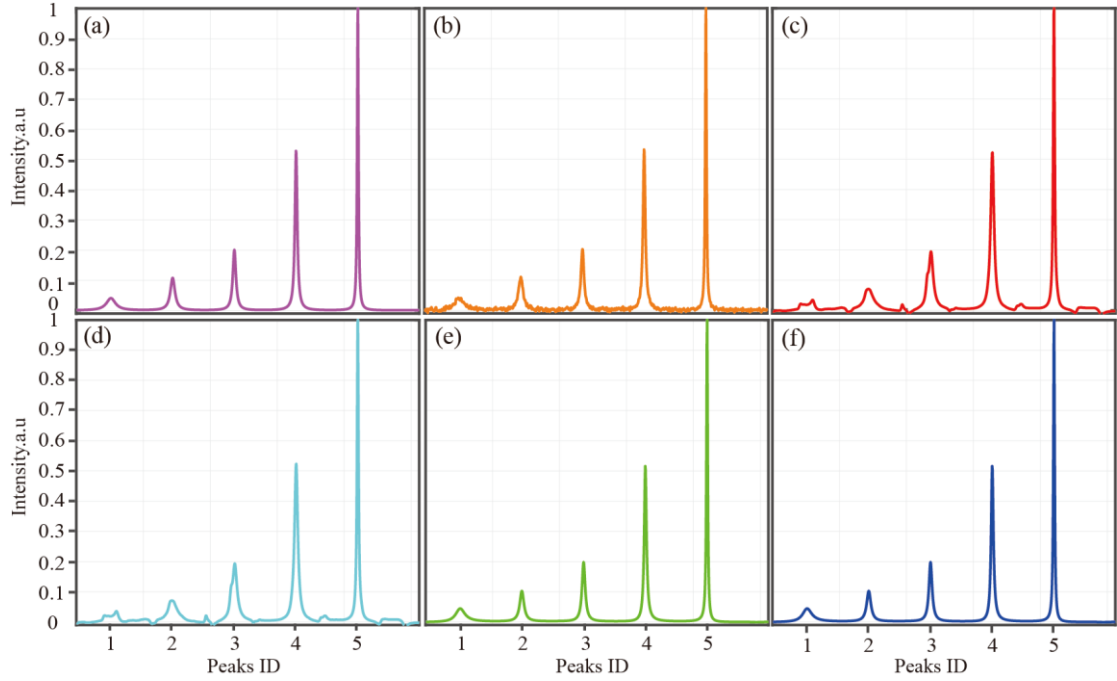

Figure S2. Moderate-fidelity reconstruction results for traditional methods. (a) The fully sampled spectrum; (b) is the noisy fully sampled spectrum; (c), (d), (e) and (f) are reconstructed spectra using the LRHM, LRHMF, SLS and SLSMF, respectively. Note: Reconstruction is performed on the synthetic 1D spectra with five peaks from 6% acquired data.

Table S2. Statistic of peaks correlations in Figure S2

| Peak ID<br>Method | 1     | 2     | 3     | 4     | 5     |
|-------------------|-------|-------|-------|-------|-------|
| LRHM              | 0.798 | 0.932 | 0.943 | 0.984 | 0.997 |
| LRHMF             | 0.793 | 0.927 | 0.942 | 0.983 | 0.997 |
| SLS               | 0.993 | 0.997 | 0.999 | 0.999 | 0.999 |
| SLSMF             | 0.993 | 0.997 | 0.999 | 0.999 | 0.999 |

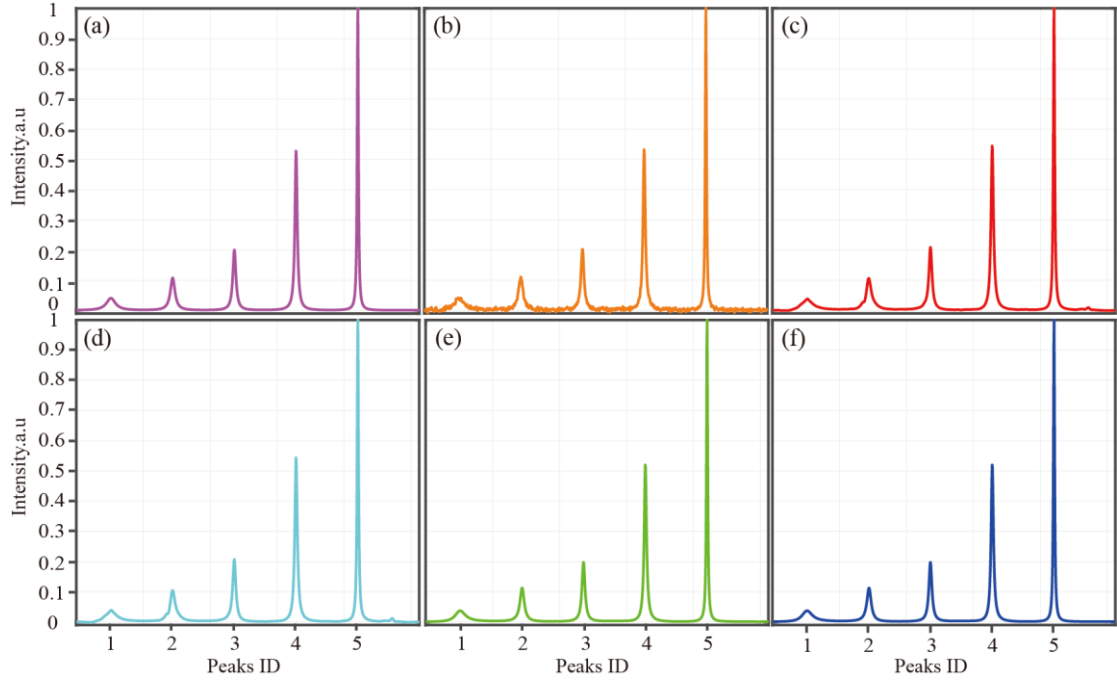

Figure S3. High-fidelity reconstruction results for traditional methods. (a) The fully sampled spectrum; (b) is the noisy fully sampled spectrum; (c), (d), (e) and (f) are reconstructed spectra using the LRHM, LRHMF, SLS and SLSMF, respectively. Note: Reconstruction is performed on the synthetic 1D spectra with five peaks from 6% acquired data.

Table S3. Statistic of peaks correlations in Figure S3

| Peak ID<br>Method | 1     | 2     | 3     | 4     | 5     |
|-------------------|-------|-------|-------|-------|-------|
| LRHM              | 0.977 | 0.995 | 0.998 | 0.999 | 0.999 |
| LRHMF             | 0.977 | 0.994 | 0.998 | 0.999 | 0.999 |
| SLS               | 0.979 | 0.998 | 0.999 | 0.999 | 0.999 |
| SLSMF             | 0.978 | 0.998 | 0.999 | 0.999 | 0.999 |
